# Supplementary material for: Non-enzymatic amperometric sensing of glucose by employing sucrose templated microspheres of copper oxide (CuO)
Source: Royal Society of Chemistry journal article supplement (doi:10.1039/c6dt00670a), 2016-01-01
Supplement: c6dt00670a1.pdf [file c6dt00670a1.pdf]

## **Supplementary Information**

### **Non-enzymatic Amperometric Sensing of Glucose by Employing Sucrose Templated Microspheres of Copper Oxide (CuO)**

**Mohit Saraf<sup>a</sup>, Kaushik Natarajan<sup>a</sup> and Shaikh M. Mobin<sup>a,b,c\*</sup>**

<sup>a</sup>Discipline of Material Science and Engineering, Indian Institute of Technology Indore, Simrol, Indore -452020, India

<sup>b</sup>Discipline of Chemistry, School of Basic Sciences, Indian Institute of Technology Indore, Simrol, Indore-452020, India

<sup>c</sup>Discipline of Bioscience and Biomedical Engineering, Indian Institute of Technology Indore, Simrol, Indore-452020, India

E-mail: [xray@iiti.ac.in](mailto:xray@iiti.ac.in)

Tel: +91 731 2438 762

**Figure Captions:**

**Fig. S1** Nitrogen adsorption-desorption isotherm of CMS, inset shows the table of obtained parameters.

**Fig. S2** Size distribution of CMS obtained by DLS.

**Fig. S3** XRD spectra of (a) CSPE and (b) MCSPE.

**Fig. S4** Amperometric response of MCSPE towards successive injections of glucose in (a) 30 mM, (b) 50 mM and (c) 100 mM NaOH solution.

**Table S1.** Circuit parameters obtained from fitting of EIS spectra.

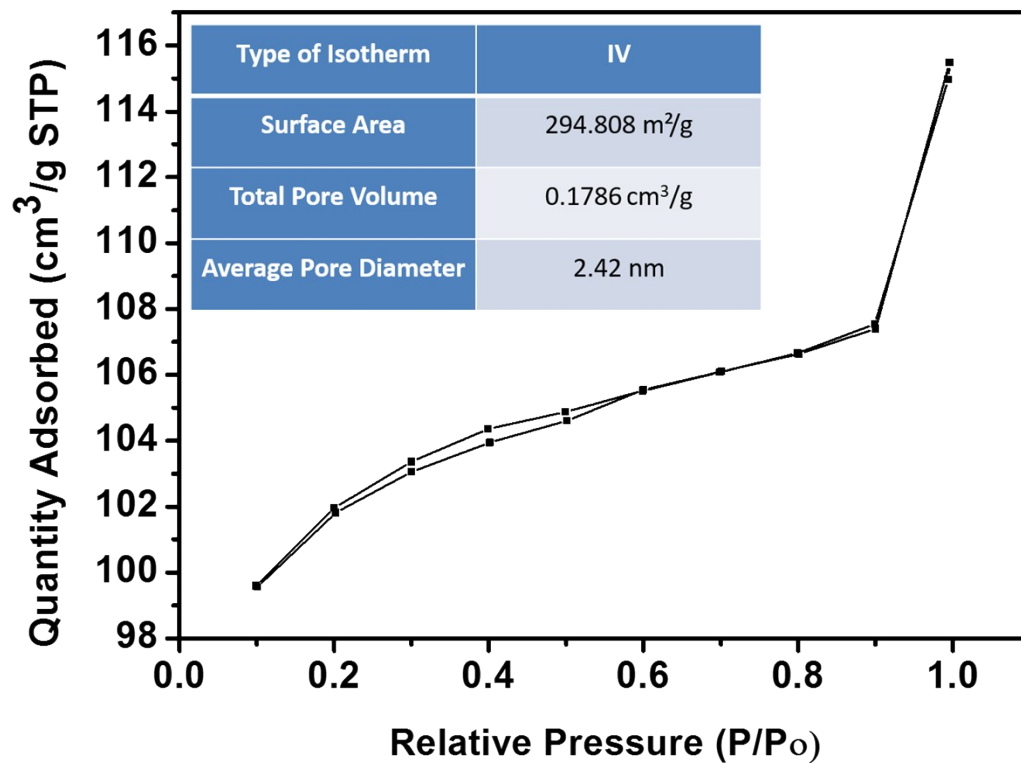

**Fig. S1** Nitrogen adsorption-desorption isotherm of CMS, inset shows the table of obtained parameters.

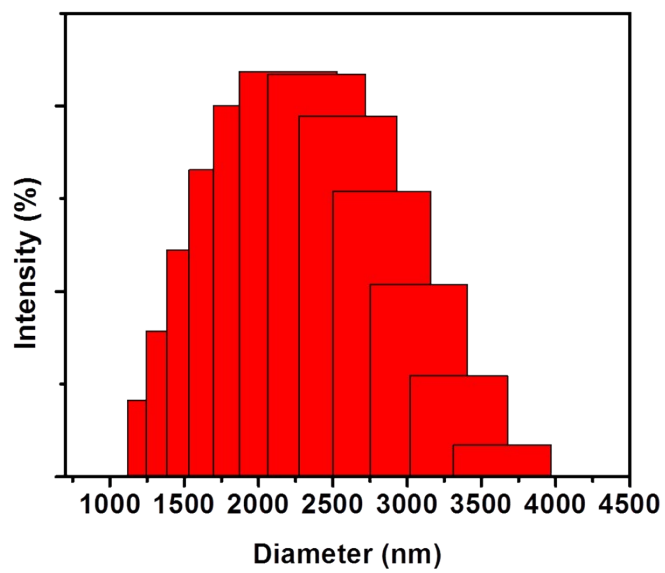

**Fig. S2** Size distribution of CMS obtained by DLS.

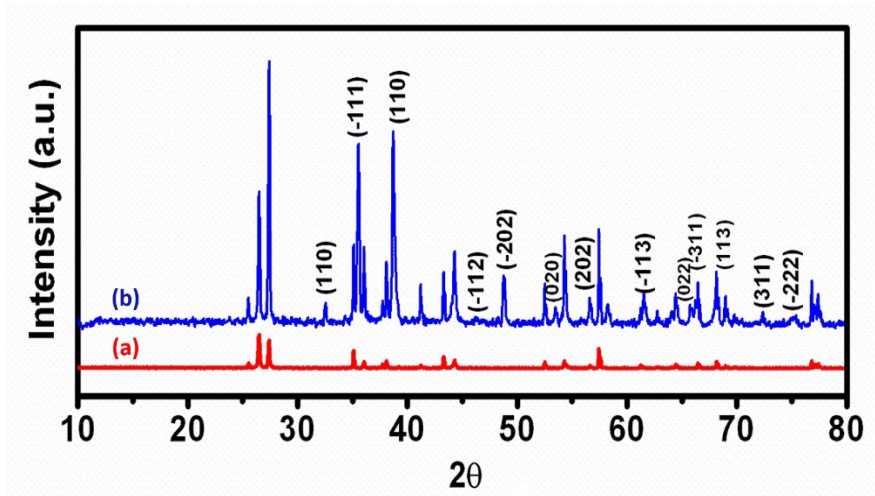

**Fig. S3** XRD spectra of (a) CSPE and (b) MCSPE.

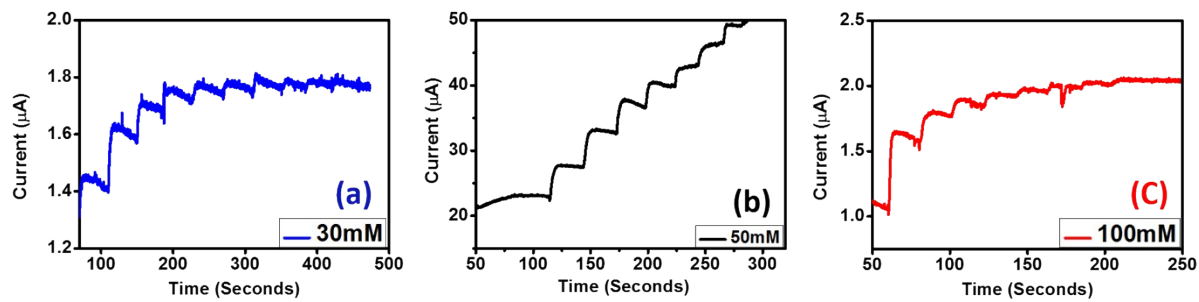

**Fig. S4** Amperometric response of MCSPE towards successive injections of glucose in (a) 30 mM, (b) 50 mM and (c) 100 mM NaOH solution.

**Table S1.** Circuit parameters obtained from fitting of EIS spectra.

| <b>Circuit measurement</b>                       | <b>Bare electrode without Glucose</b> | <b>Bare Electrode with Glucose</b> | <b>MCSPE without Glucose</b> | <b>MCSPE with glucose</b> |
|--------------------------------------------------|---------------------------------------|------------------------------------|------------------------------|---------------------------|
| <b><math>R_s</math> (<math>\Omega</math>)</b>    | 172                                   | 198                                | 177.9                        | 157.3                     |
| <b><math>R_{ct}</math> (<math>\Omega</math>)</b> | 2787                                  | 1835                               | 1364                         | 1156                      |
| <b><math>C_{dl}</math> (<math>\mu F</math>)</b>  | 57.19                                 | 30.09                              | 395                          | 470                       |

Where:

$R_s$  corresponds to resistance due to electrolyte and test set up.

$R_{ct}$  tells the charge transfer resistance inside the material.

$C_{dl}$  is the capacitance due to formation of depletion region in semiconductor.
